# Supplementary material for: Association Between the Method of Delivery and Respiratory Outcomes in Extremely Preterm and Extremely Low Birth Weight Infants: a Retrospective Cohort Study in Newborns From 2000-2003
Source: Research Square preprint supplement (doi:10.21203/rs.3.rs-290662/v1), 2021-03-15
Supplement: Supplementary file 1 [file c0419d9033005cb6cde9470b.xlsx]

## Sheet: Blad1
Additional table 2: Association between the method of delivery and the incidence of respiratory morbidity and treatment in the neonatal period.
	Vaginal birth infants	Cesarean birth infants	p-value
	(n = 53)	(n = 119)
Respiratory morbidity
RDS, n (%)	42 (79.2%)	88 (73.9%)	0.455
BPD, n (%)	19 (35.8%)	30 (25.2%)	0.153
Pneumothorax, n (%)	6 (11.3%)	7 (5.9%)	0.224
Respiratory treatment
Invasive MV
n (%)	43 (81.1%)	84 (70.6%)	0.146
time a (days)	5.0 (1.0-14.3)	3.0 (0.0-11.0)	0.280
CPAP
n (%)	39 (73.6%)	96 (80.7%)	0.296
time b (days)	2.0 (0.0-16.8)	6.0 (1.0-12.0)	0.315
Nasal oxygen, n (%)	11 (20.8%)	38 (31.9%)	0.134
Total respiratory support time c (days)	16.0 (5.8-42.3)	15.0 (4.0-32.8)	0.509
Pharmacological treatment
Nitric oxide, n (%)	6 (11.3%)	14 (11.8%)	0.933
Surfactant, n (%)	25 (47.2%)	51 (42.9%)	0.599
Postnatal steroids, n (%)	6 (11.3%)	10 (8.4%)	0.575
Non-normally distributed variables are presented as median (IQR) and categorical variables as number of subjects (%). Abbreviations: BPD = bronchopulmonary dysplasia. CI = confidence interval. CPAP = continuous positive airway pressure. MV = mechanical ventilation. RDS = respiratory distress syndrome. RR = relative risk. Alphabetic character in superscript indicates a sample size deviant from n =…
